# Supplementary material for: Baseline Tumor Size Is an Independent Prognostic Factor for Overall Survival in Patients with Melanoma Treated with Pembrolizumab
Source: Oxford University Press journal article supplement (doi:10.1158/1078-0432.ccr-17-2386), 2018-04-23
Supplement: 10780432ccr172386-sup-187865_3_supp_4673190_p6q19y.docx [file 10780432ccr172386-sup-187865_3_supp_4673190_p6q19y.docx]

**Supplemental Figure Legends**

**Supplemental Figure S1.** Distribution of baseline tumor size. SD, standard deviation.

**Supplemental Figure S2.** Kaplan-Meier estimate of overall survival in previously untreated patients with baseline tumor size above or below the median.
