# Supplementary material for: Baseline Tumor Size Is an Independent Prognostic Factor for Overall Survival in Patients with Melanoma Treated with Pembrolizumab
Source: Oxford University Press journal article supplement (doi:10.1158/1078-0432.ccr-17-2386), 2018-04-23
Supplement: 10780432ccr172386-sup-187865_3_supp_4673192_p6q19y.docx [file 10780432ccr172386-sup-187865_3_supp_4673192_p6q19y.docx]

**Supplemental Table S2.** Association of baseline tumor size with overall survival and objective response rate in previously untreated patients with measurable disease (*n* = 134)

| **Factor** | **Overall survival** | | | **Response** | |
| --- | --- | --- | --- | --- | --- |
| **Alive at 1 year,**  **% (95% CI)** | **HR** | ***P*** | **ORR, %** | ***P* value** |
| BTS (SLD) | | | | | |
| Below median (≤10.2 cm) | 83 (72.8-89.9) | 0.38 | <0.001 | 50 | 0.163 |
| Above median (>10.2 cm) | 56 (41.7-67.9) | 38 |

Abbreviations: BTS, baseline tumor size; HR, hazard ratio; ORR, objective response rate; SLD, sum of the longest diameters.
